# Supplementary material for: Flame-Retardant GF-PSB/DOPO-POSS Composite with Low Dk/Df and High Thermal Stability for High-Frequency Copper Clad Applications
Source: MDPI journal article supplement (doi:10.3390/polym16040544), 2024-02-17
Supplement: s1 [file s1]

## Supporting Information

### Flame-Retardant GF-PSB/DOPO-POSS Composite Laminate with Low Dk/Df and High Thermal Stability for High-Frequency Copper Clad Laminate

Ke Zheng <sup>1</sup>, Yizhi Zhang <sup>1</sup>, Jiaxiang Qiu <sup>2</sup>, Guanqun Xie <sup>2,\*</sup>, Zengbiao Huang <sup>3</sup>, Wei Lin <sup>3</sup>, Zhimeng Liu <sup>1</sup>,

Qianfa Liu <sup>3</sup>, Xiaoxia Wang <sup>1,\*</sup>

<sup>1</sup> Subcenter of Dongguan University of Technology of National Engineering Research Center of Electronic Circuits Base Materials, School of Materials Science and Engineering, Dongguan University of Technology, Dongguan 523808, China; zhengke@dgut.edu.cn (K.Z.); 1150777934@qq.com (Y.Z.); 806953921@qq.com (Z.L.)

<sup>2</sup> School of Environment and Civil Engineering, Dongguan University of Technology, Dongguan, 523808, PR China; 915849945@qq.com (J.Q.);

<sup>3</sup> National Engineering Research Center of Electronic Circuits Base, Materials SHENGYI Technology Co. Ltd., Dongguan 523808, China; huangzb@syst.com.cn (Z.H.); linw@syst.com.cn (W.L.); Liuqf@syst.com.cn (Q.L.)

\* Correspondence: wangxx@dgut.edu.cn (X.W.); gqxie@dgut.edu.cn (G.X.)

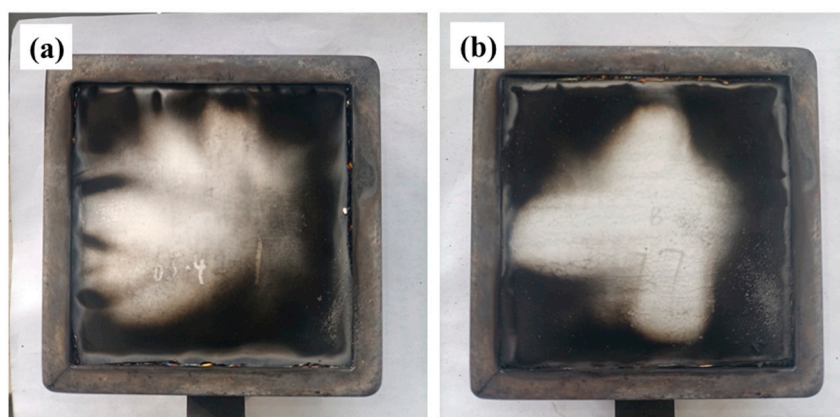

**Figure S1.** Digital pictures of the residue of (a) GF-PSB/PX-200 and (b) GF-PSB/DOPO-POSS composites after cone calorimeter tests.

**Table S1.** TGA data of the samples.

| Samples          | $T_{5\%}$ (°C) <sup>a</sup> | $T_{\max}$ (°C) <sup>b</sup> | Residues (% , 555 °C) |
|------------------|-----------------------------|------------------------------|-----------------------|
| PSB              | 397                         | 460                          | 0.5                   |
| PX-200           | 332                         | 401                          | 0.7                   |
| DOPO-POSS        | 373                         | 493                          | 48.9                  |
| GF-PSB/PX-200    | 431                         | 450                          | 77.0                  |
| GF-PSB/DOPO-POSS | 446                         | 461                          | 80.8                  |

<sup>a</sup>  $T_{5\%}$  is the temperature with 5% weight loss. <sup>b</sup>  $T_{\max}$  is the temperature with maximum decomposition rate.

**Table S2.** DMA results for various laminates.

| Samples          | E' at 50 °C (MPa) | E' at 150 °C (MPa) | E' at 250 °C (MPa) | T <sub>g</sub> (°C) |
|------------------|-------------------|--------------------|--------------------|---------------------|
| GF-PSB           | 17677             | 15923              | 12365              | 253                 |
| GF-PSB/PX-200    | 16971             | 10520              | 6998               | 168                 |
| GF-PSB/DOPO-POSS | 19600             | 17709              | 9816               | 227                 |

**Table S3.** Cone calorimeter data for the flame-retarded PSB.

| Composites                   | GF-PSB/PX-200 | GF-PSB/DOPO-POSS |
|------------------------------|---------------|------------------|
| av-HRR (kW/m <sup>2</sup> )  | 86.30         | 88.76            |
| THR (MJ/m <sup>2</sup> )     | 28            | 33               |
| TSP (m <sup>2</sup> )        | 15.355        | 15.489           |
| av-COY (kg/kg)               | 0.1435        | 0.1132           |
| av-CO <sub>2</sub> Y (kg/kg) | 1.1847        | 1.4087           |
| av-EHC (MJ/kg)               | 19.226        | 22.23            |
| av-MLR (g/s)                 | 0.0398        | 0.035            |
| av-SEA (m <sup>2</sup> /kg)  | 1180.014      | 1168.881         |
